# Supplementary material for: [Mn(dien)2]MnSnS4, [Mn(1,2-dap)]2Sn2S6 and [Mn(en)2]MnGeS4: from 1D anionic and neutral chains to 3D neutral frameworks
Source: Royal Society of Chemistry journal article supplement (doi:10.1039/c4ce02063d), 2014-11-19
Supplement: c4ce02063d1.pdf [file c4ce02063d1.pdf]

# [Mn(dien)<sub>2</sub>]MnSnS<sub>4</sub>, [Mn(1,2-dap)]<sub>2</sub>Sn<sub>2</sub>S<sub>6</sub> and [Mn(en)<sub>2</sub>]MnGeS<sub>4</sub>: From 1D Anionic and Neutral Chains to 3D Neutral Framework

Cheng-Yang Yue, Xiao-Wu Lei,\* Ling Yin, Xiu-Rong Zhai, Zhong-Ren Ba, Yan-Qiang Niu,

Yue-Peng Li

**Table S1.** Hydrogen bonds data for compounds **1-3**.

| D-H...A             | d(D-H) | d(H...A) | d(D...A) | <(DHA) |
|---------------------|--------|----------|----------|--------|
| <b>1</b>            |        |          |          |        |
| N(2)-H(2D)...S(1)#1 | 0.90   | 2.63     | 3.483(2) | 159.6  |
| <b>2</b>            |        |          |          |        |
| N(2)-H(2C)...S(1)#2 | 0.91   | 2.66     | 3.523(9) | 159.5  |
| N(6)-H(6D)...S(1)#3 | 0.90   | 2.73     | 3.529(7) | 148.9  |
| N(5)-H(5C)...S(4)#1 | 0.91   | 2.58     | 3.457(6) | 162.7  |
| N(4)-H(4C)...S(2)#4 | 0.90   | 2.71     | 3.535(6) | 153.6  |
| N(4)-H(4D)...S(1)#2 | 0.90   | 2.83     | 3.564(7) | 139.8  |
| N(1)-H(1C)...S(3)#1 | 0.90   | 2.66     | 3.540(7) | 167.5  |
| N(3)-H(3D)...S(4)#3 | 0.90   | 2.78     | 3.546(7) | 143.2  |
| <b>3</b>            |        |          |          |        |
| N(4)-H(4C)...S(2)#1 | 0.90   | 2.78     | 3.421(3) | 128.8  |
| N(4)-H(4D)...S(1)#1 | 0.90   | 2.65     | 3.546(4) | 174.8  |
| N(3)-H(3B)...S(1)#3 | 0.90   | 2.60     | 3.487(4) | 167.6  |
| N(3)-H(3C)...S(1)#2 | 0.90   | 2.77     | 3.648(4) | 164.3  |
| N(1)-H(1C)...S(2)   | 0.90   | 3.00     | 3.840(4) | 156.8  |

Symmetric codes: for **1**: #1 x+1/2, y-1/2, -z+2; for **2**: #1 x, -y+2, z+1/2, #2 x-1, -y+2, z+1/2, #3 x-1/2, -y+3/2, z+1/2, #4 x-1, y, z; for **3**: #1 -x, -y, -z, #2 -x+1, -y, -z, #3 x, y, z-1.

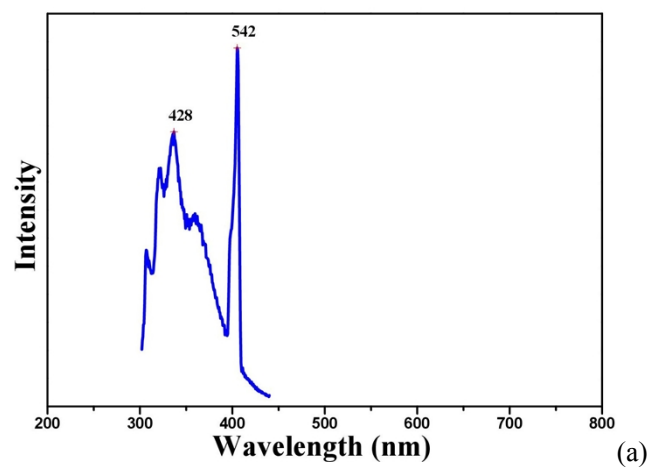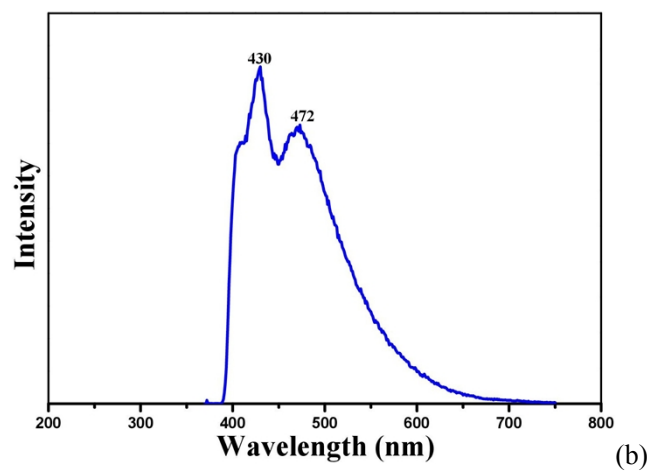

**Fig. S1.** Photoluminescent emission spectra of the title compounds **1** (a) and **2** (b).

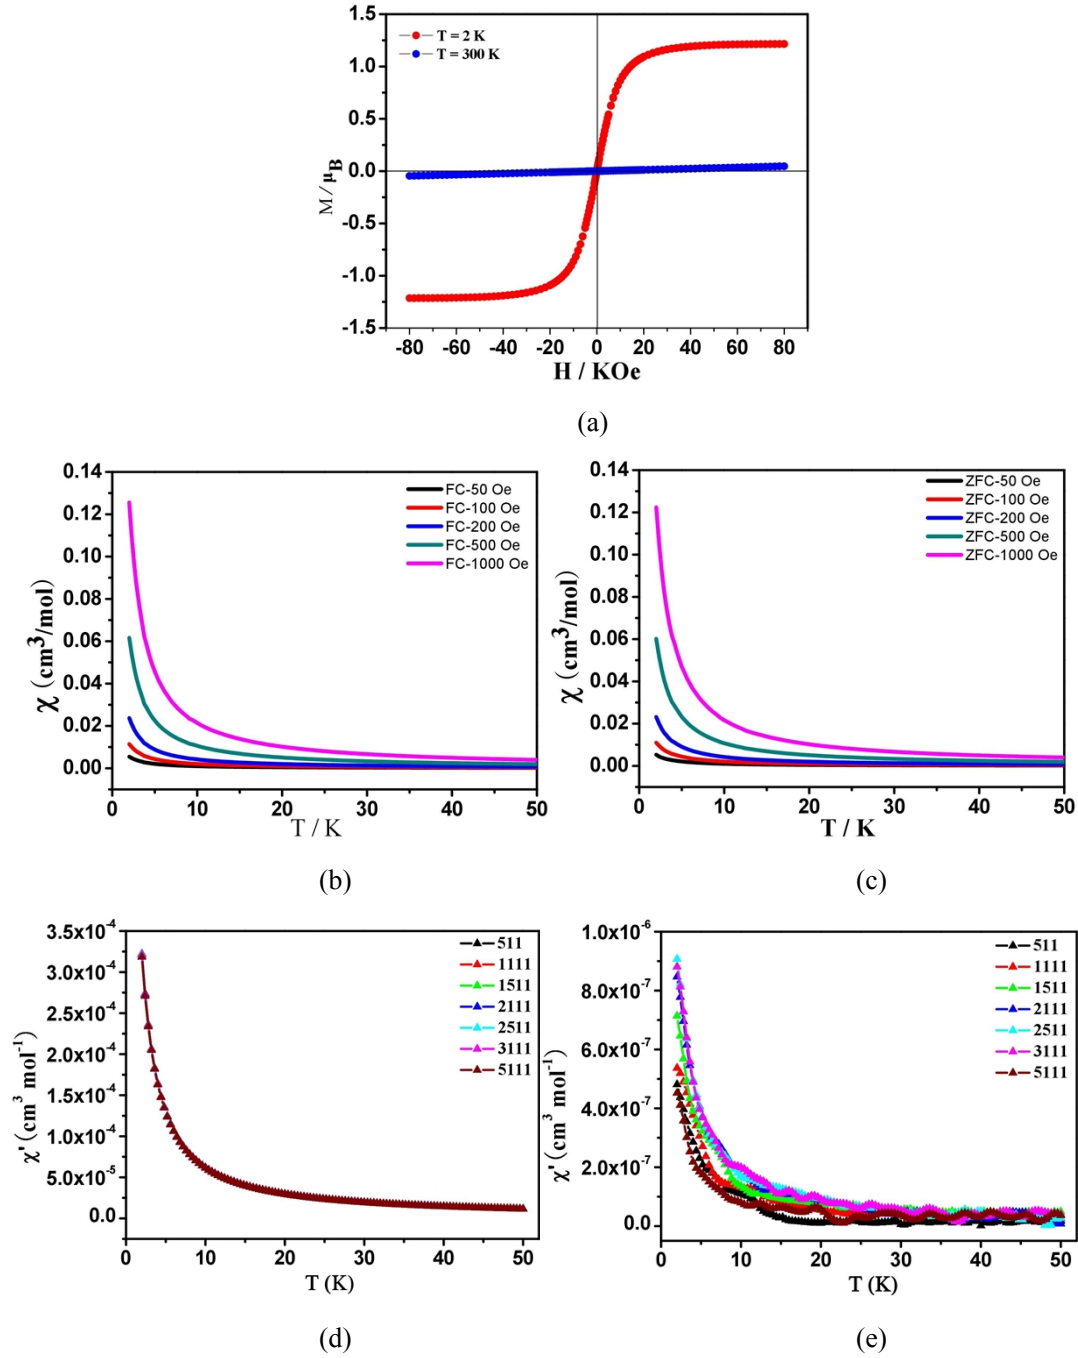

**Fig S2.**  $M$  vs  $H$  plot at 2K (a), the zero-field-cooled (ZFC) and field-cooled (FC) molar magnetic susceptibility (b-c), the temperature dependence of the out-of phase ( $\chi''$ ) ac and in-phase ( $\chi'$ ) dc magnetic susceptibilities (d-e), for compound 3.

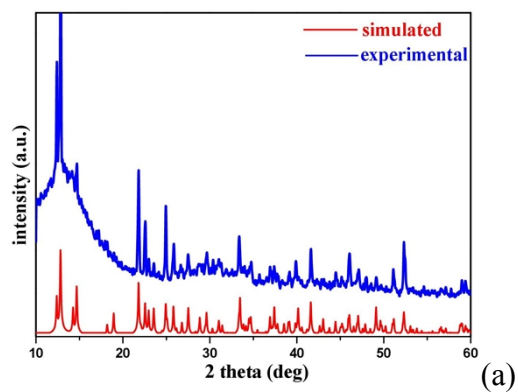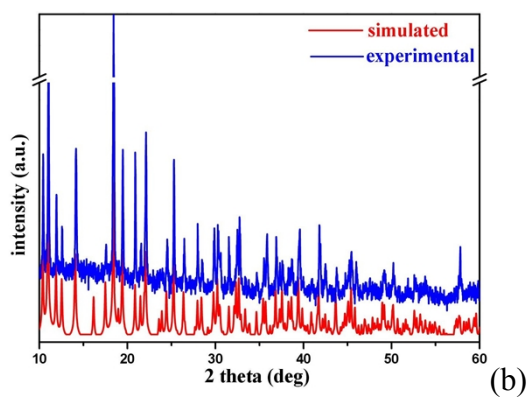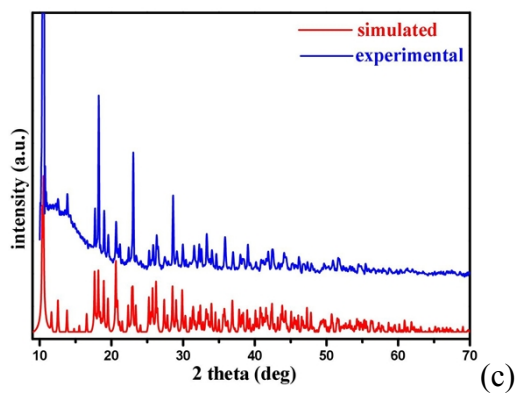

**Fig S3.** Experimental and simulated XRD powder pattern for compounds **1** (a), **2** (b) and **3** (c).
